# Supplementary material
Source: publisher figshare collection journal article supplement (https://acs.figshare.com/ndownloader/files/20332335)
Supplement: Supplementary file 1 [file 20332335]

**Janus electrode of asymmetric wettability for H<sub>2</sub>O<sub>2</sub> production with highly-efficient O<sub>2</sub> utilization**

Haichuan Zhang,<sup>†,a,b</sup> Yingshuang Zhao,<sup>†,a,b</sup> Yingjie Li,<sup>c</sup> Guanghe Li,<sup>a,b</sup> Juan Li<sup>d</sup> and Fang Zhang<sup>\*,a,b</sup>

<sup>a</sup>School of Environment and State Key Joint Laboratory of Environment Simulation and Pollution Control, Tsinghua University, Beijing 100084, China

<sup>b</sup>National Engineering Laboratory for Site Remediation Technologies, Beijing 100015, China

<sup>c</sup>Department of Materials Science and Engineering, College of Engineering, Peking University, Beijing 100871, P. R. China

<sup>d</sup>Advanced Research Institute for Multidisciplinary Science, Beijing Institute of Technology, 100081, P.R. China

<sup>†</sup>Haichuan Zhang and Yingshuang Zhao contributed equally to this work.

\*Corresponding author.

Fang Zhang: Email: fangzhang@tsinghua.edu.cn, phone: 86-10-62789655

**Table S1.** The contact angles of different electrodes.

| Electrode             | Surface        | Contact Angles of Water (°) | Contact Angles of Gas (°) |
|-----------------------|----------------|-----------------------------|---------------------------|
| Janus electrode       | Hydrophobic GF | 137.7                       | 0                         |
|                       | Hydrophilic CL | 74.7                        | -                         |
| Hydrophilic electrode | Hydrophilic GF | 81.2                        | 137.6                     |
|                       | Hydrophilic CL | 76.7                        | -                         |
| Hydrophobic electrode | Hydrophobic GF | 138.3                       | 0                         |
|                       | Hydrophobic CL | 132.6                       | -                         |

**Table S2.** The dissolved oxygen concentrations of electrolyte solution with different O<sub>2</sub> flow rates.

| O <sub>2</sub> flow rate (mL min <sup>-1</sup> ) | Dissolved oxygen concentration (mg L <sup>-1</sup> ) |       |       | Average DO (mg L <sup>-1</sup> ) |
|--------------------------------------------------|------------------------------------------------------|-------|-------|----------------------------------|
|                                                  | 1                                                    | 2     | 3     |                                  |
| 0                                                | 10.09                                                | 11.88 | 11.74 | 11.24 ± 0.81                     |
| 0.25                                             | 10.24                                                | 12.22 | 12.07 | 11.51 ± 0.90                     |
| 0.5                                              | 10.28                                                | 12.31 | 12.27 | 11.62 ± 0.95                     |
| 1                                                | 11.24                                                | 12.76 | 12.33 | 12.11 ± 0.64                     |
| 6                                                | 13.74                                                | 15.75 | 16.63 | 15.37 ± 1.21                     |
| 60                                               | 39.03                                                | 37.53 | 38.02 | 38.19 ± 0.62                     |

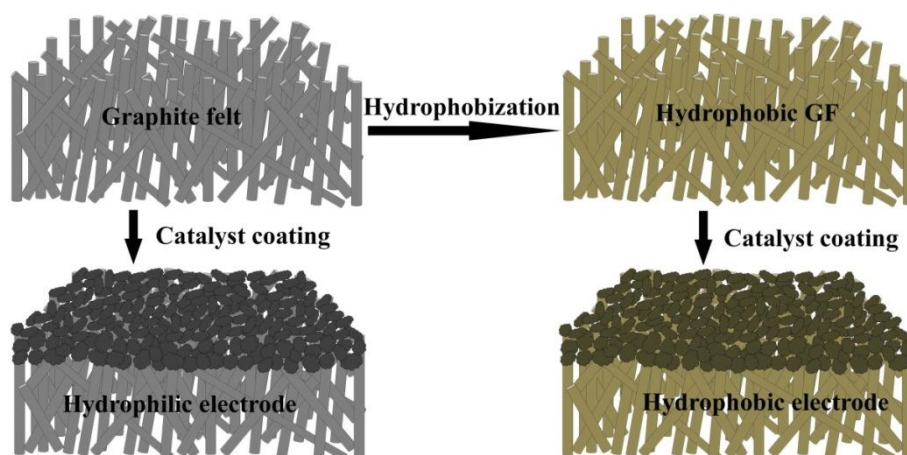

**Figure S1.** Fabrication schematic illustration of hydrophilic and hydrophobic electrodes.

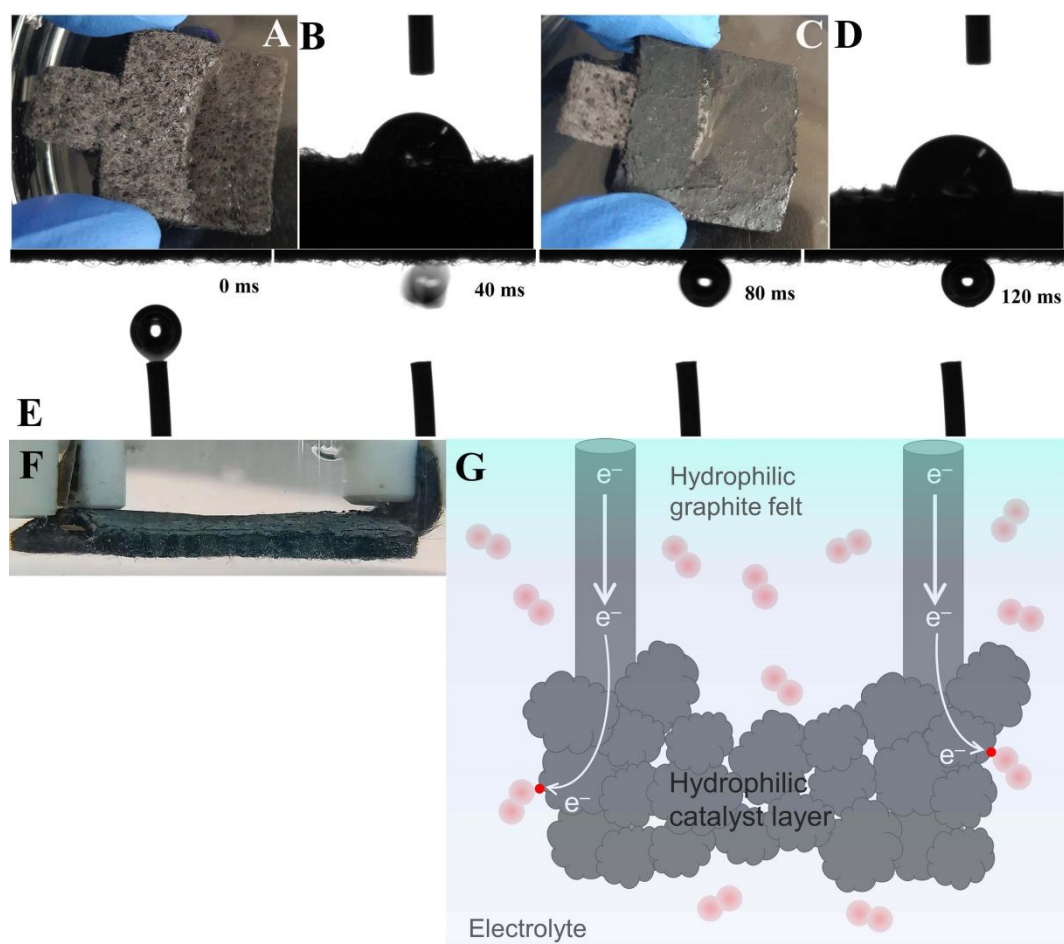

**Figure S2.** (A) Photograph and (B) water contact angle of graphite felt in hydrophilic electrode; (C) photograph and (D) water contact angle of hydrophilic catalyst layer in hydrophilic electrode; (E) gas contact angle of graphite felt in hydrophilic electrode; (F) side-view photograph and (G) schematic illustration of the hydrophilic electrode submerged in electrolyte.

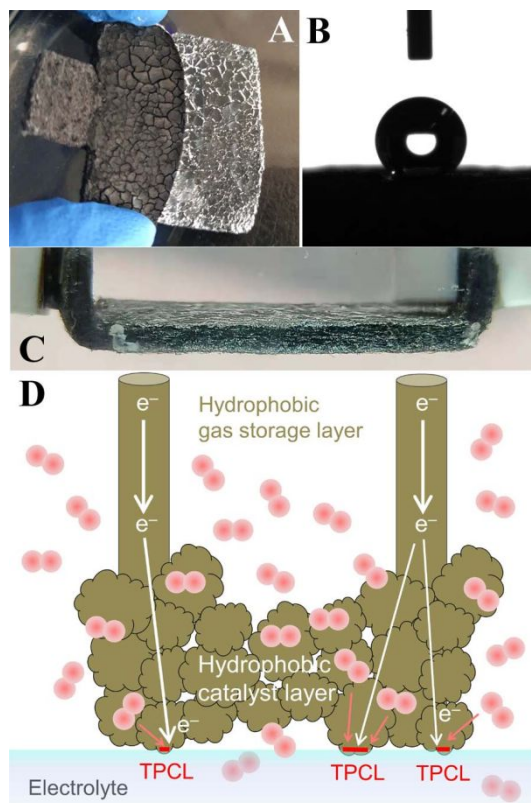

**Figure S3.** (A) Photograph and (B) water contact angle of hydrophobic catalyst layer in hydrophobic electrode; (C) side-view photograph and (D) schematic illustration of the hydrophobic electrode submerged in electrolyte.

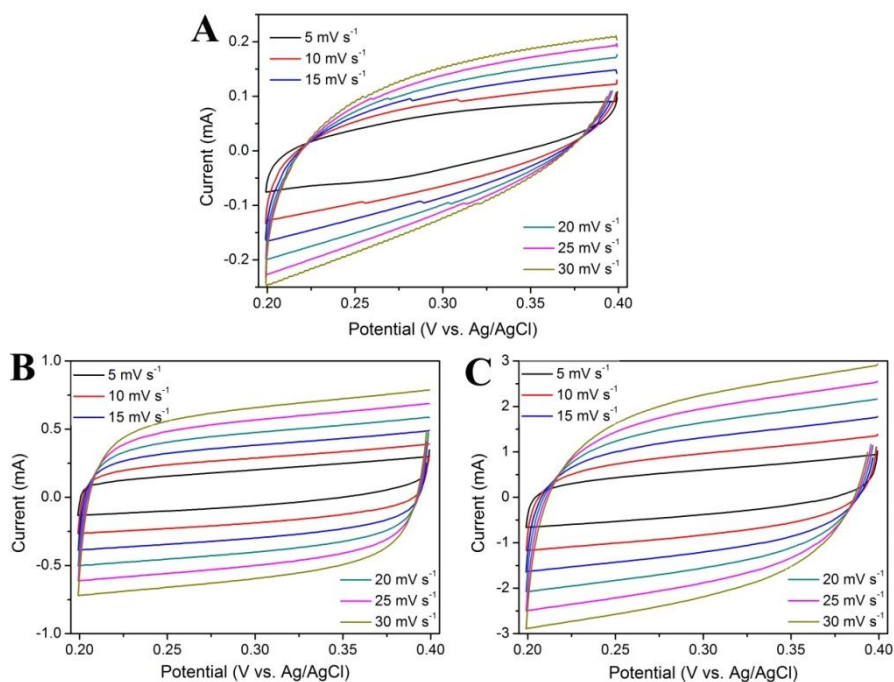

**Figure S4.** EDLC measurements of three electrodes, including (A) hydrophobic electrode, (B) Janus electrode and (C) hydrophilic electrode.

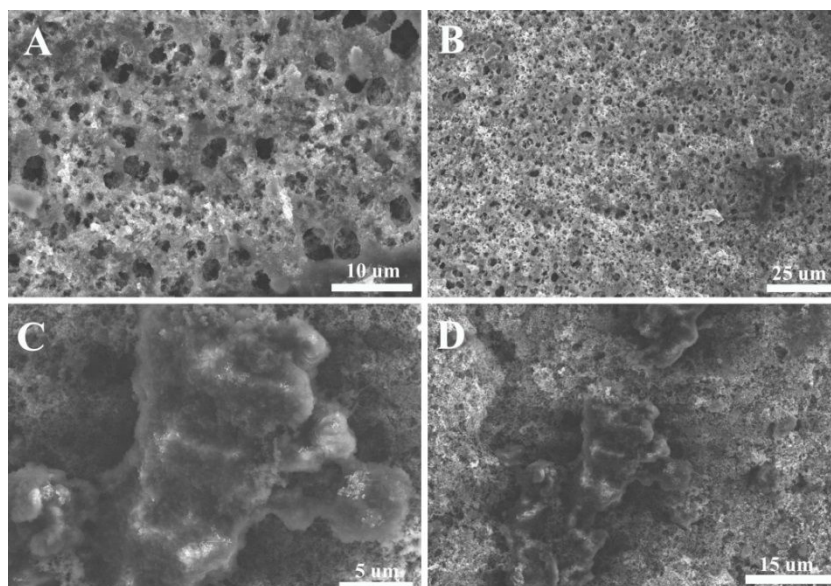

**Figure S5.** High-resolution and low-resolution SEM image of (A and B) hydrophilic and (C and D) hydrophobic catalyst layer.

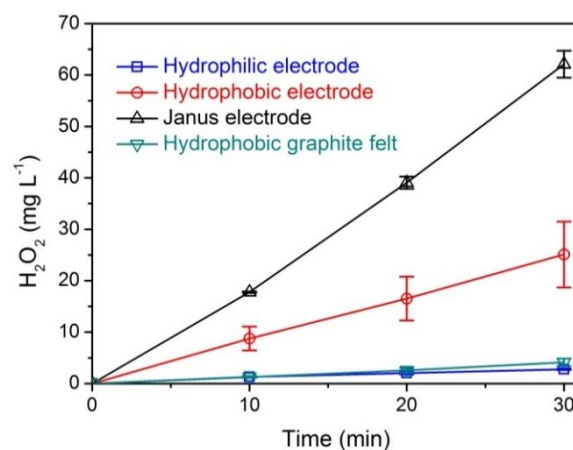

**Figure S6.** H<sub>2</sub>O<sub>2</sub> productions with reaction time for the Janus, hydrophobic electrode, hydrophobic graphite felt and hydrophilic electrode with O<sub>2</sub> flow rate of 6 mL min<sup>-1</sup>.

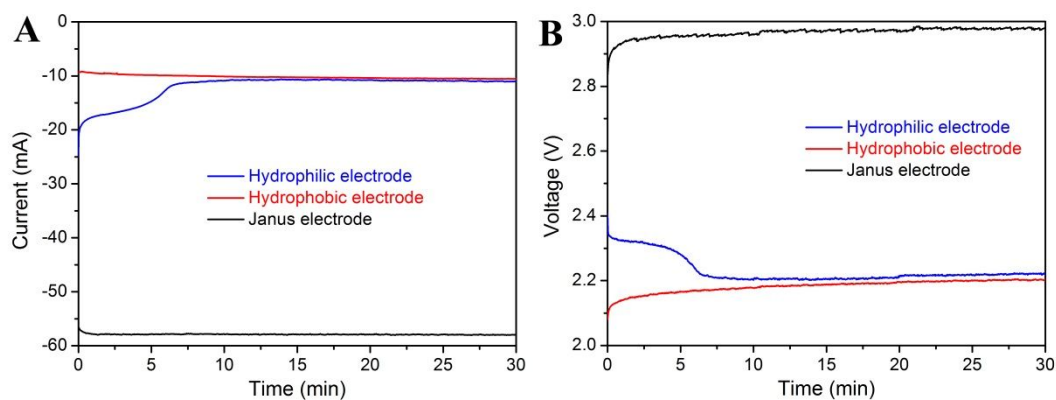

**Figure S7.** (A) Current and (B) voltage with time for the Janus, hydrophobic and hydrophilic electrodes at -0.4 V vs. Ag/AgCl with O<sub>2</sub> flow rate of 6 mL min<sup>-1</sup>.
